# Supplementary material for: N-Isopropylbenzylammonium tetrafluoroborate: an organic dielectric relaxor with a tunable transition between high and low dielectric states
Source: Royal Society of Chemistry journal article supplement (doi:10.1039/c3tc31378f), 2013-10-22
Supplement: c3tc31378f.pdf [file c3tc31378f.pdf]

## Supplementary Information

# N-Isopropylbenzylammonium Tetrafluoroborate: An Organic Dielectric Relaxor with Tunable Transition between High and Low Dielectric States

Chengmin Ji,<sup>a</sup> Zhihua Sun,<sup>a,b,c</sup> Shu-Quan Zhang,<sup>a,b</sup> Tianliang Chen,<sup>a</sup> Pan Zhou,<sup>a</sup> Junhua Luo<sup>a,b,\*</sup>

<sup>a</sup>Key Laboratory of Optoelectronic Materials Chemistry and Physics, Fujian Institute of Research on the Structure of Matter, Chinese Academy of Sciences, Fuzhou, Fujian 350002, China

<sup>b</sup>State Key Laboratory of Structural Chemistry, Fujian Institute of Research on the Structure of Matter, Chinese Academy of Sciences, Fuzhou, Fujian 350002, China

<sup>c</sup>State Key Laboratory of Crystal Material, Shandong University, Jinan, 250100, China

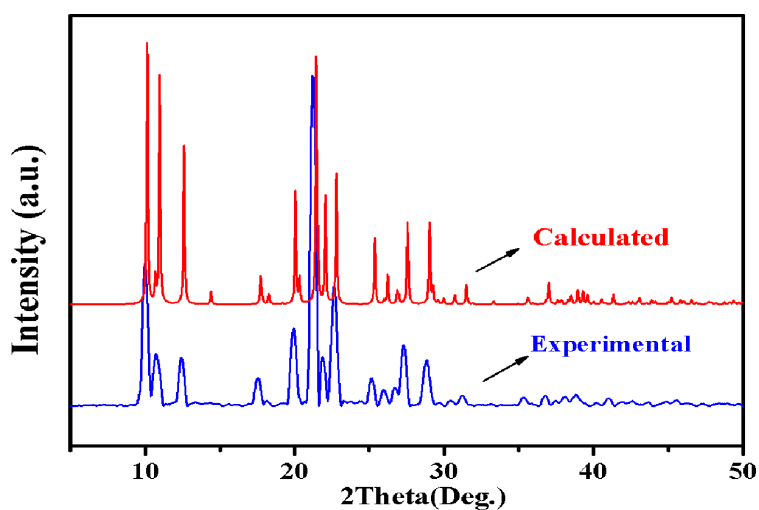

**Figure S1.** Simulated and experimental XRD powder patterns for compounds 1.

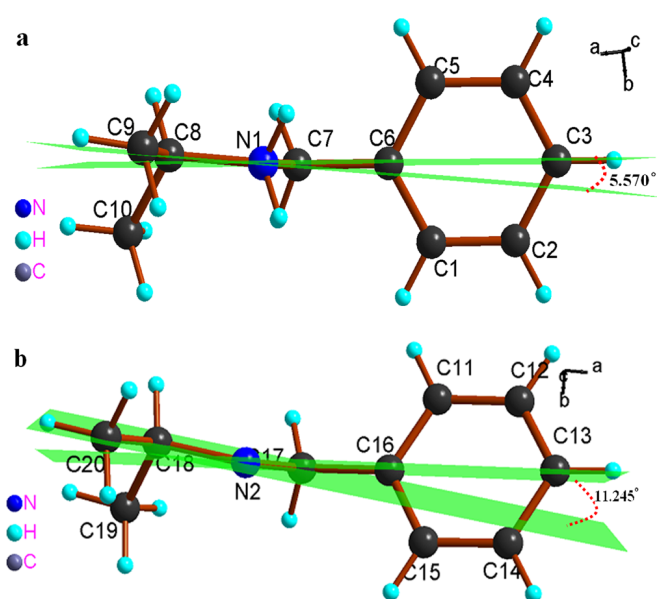

**Figure S2.** The dihedral angle of the different configurational N-MBA cations in low temperature phase: (a)LTPa and (b)LTPb.

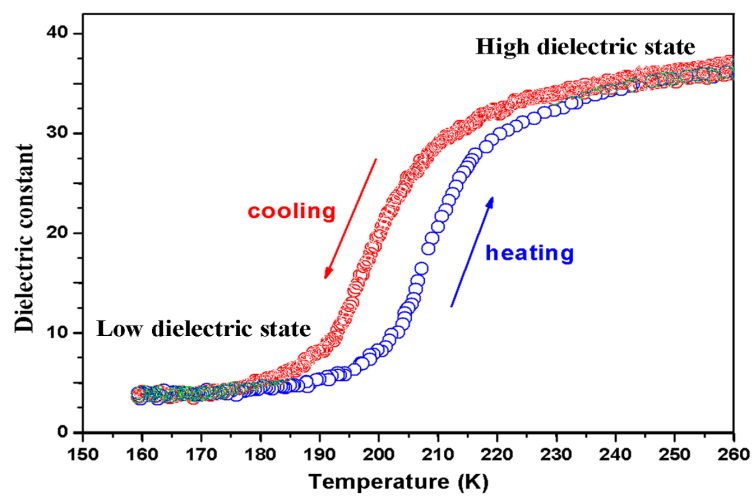

**Figure S3.** Dielectric constant measured in the cooling and heating cycle at 100 KHz.

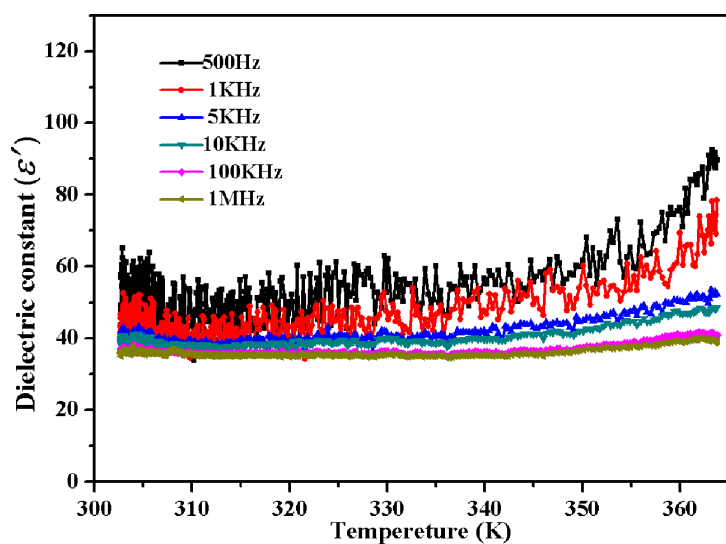

Figure S4. Dielectric constant measured at the high temperature .

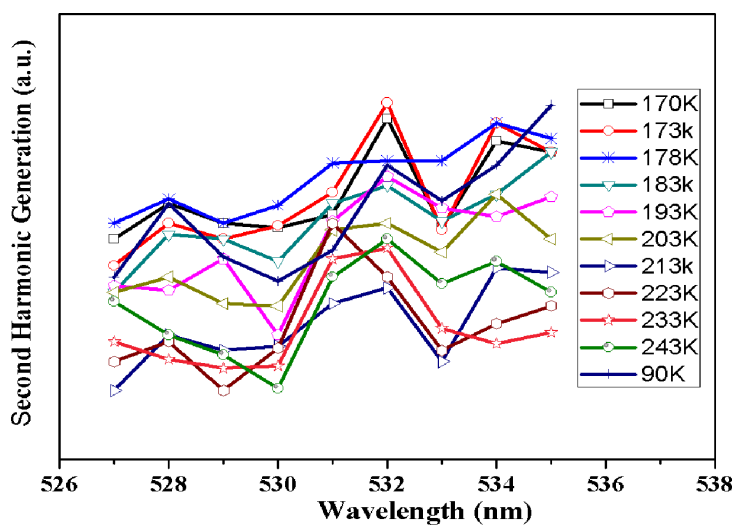

Figure S5. The second-order nonlinear optical experiment at 532 nm at different temperature.

**Table S1.** Crystal data and structural refinement for compound **1**

|                                                                             |                                                                 |                                                                 |
|-----------------------------------------------------------------------------|-----------------------------------------------------------------|-----------------------------------------------------------------|
| Empirical formula                                                           | C <sub>10</sub> H <sub>16</sub> B F <sub>4</sub> N              | C <sub>10</sub> H <sub>16</sub> B F <sub>4</sub> N              |
| Formula weight                                                              | 244.26                                                          | 244.26                                                          |
| Temperature/K                                                               | 293(2)                                                          | 100(2)                                                          |
| Radiation                                                                   | Mo-Kα (0.71073 Å)                                               | Mo-Kα (0.71073 Å)                                               |
| Crystal system                                                              | Monoclinic                                                      | Monoclinic                                                      |
| Space group                                                                 | C2/m                                                            | C2/c                                                            |
| <i>a</i> /Å                                                                 | 18.493(4)                                                       | 19.550(4)                                                       |
| <i>b</i> /Å                                                                 | 7.7954(16)                                                      | 7.7410(15)                                                      |
| <i>c</i> /Å                                                                 | 10.016(2)                                                       | 32.466(7)                                                       |
| <i>α</i> /deg                                                               | 90                                                              | 90                                                              |
| <i>β</i> /deg                                                               | 119.35(3)                                                       | 95.61(3)                                                        |
| <i>γ</i> /deg                                                               | 90                                                              | 90                                                              |
| Volume/ Å <sup>3</sup>                                                      | 1258.6(4)                                                       | 4889.8(17)                                                      |
| Z                                                                           | 4                                                               | 16                                                              |
| Calculated density/g cm <sup>-3</sup>                                       | 1.262                                                           | 1.288                                                           |
| Absorption coefficient/mm <sup>-1</sup>                                     | 0.114                                                           | 0.117                                                           |
| <i>F</i> (000)                                                              | 504.0                                                           | 1984.0                                                          |
| Crystal size/mm                                                             | 0.33×0.24×0.16                                                  | 0.33×0.24×0.16                                                  |
| Limiting indices                                                            | -18<= <i>h</i> <=24, -9<= <i>k</i> <=10,<br>-13<= <i>l</i> <=12 | -24<= <i>h</i> <=25, -10<= <i>k</i> <=8,<br>-41<= <i>l</i> <=33 |
| Reflections collected / unique                                              | 3963 / 1547 [ <i>R</i> (int) = 0.0227]                          | 13402/ 5434 [ <i>R</i> (int) = 0.0434]                          |
| GOF                                                                         | 1.044                                                           | 1.024                                                           |
| <i>R</i> <sub>1</sub> , w <i>R</i> <sub>2</sub> [ <i>I</i> >2σ( <i>I</i> )] | 0.0939/0.3083                                                   | 0.0800/0.2094                                                   |
| <i>R</i> <sub>1</sub> , w <i>R</i> <sub>2</sub> (all data)                  | 0.1459/0.3382                                                   | 0.0964/0.2236                                                   |

**Table 2.** Selected bond lengths (Å) and angles (°) for compound **1** (293K)

| bond lengths | (Å)      | bond lengths | (Å)      | bond lengths | (Å)       |
|--------------|----------|--------------|----------|--------------|-----------|
| N(1)-C(5)    | 1.484(5) | F(2)-B(1)    | 1.358(4) | B(1)-F(3)    | 1.336(7)  |
| N(1)-C(6)    | 1.483(5) | C(6)-C(7)#1  | 1.374(9) | B(1)-F(2)#1  | 1.358(4)  |
| C(1)-C(2)    | 1.358(6) | C(6)-C(7)    | 1.374(9) | C(2)-C(3)    | 1.388(7)  |
| C(1)-C(2)#1  | 1.358(6) | C(6)-C(8)    | 1.486(7) | C(7)-C(7)#1  | 1.230(19) |
| C(1)-C(5)    | 1.499(7) | B(1)-F(1)    | 1.287(7) | C(4)-C(3)#1  | 1.349(9)  |
|              |          |              |          | C(4)-C(3)    | 1.349(9)  |

| bond angles      | (°)      | bond angles      | (°)      | bond angles      | (°)       |
|------------------|----------|------------------|----------|------------------|-----------|
| C(5)-N(1)-C(6)   | 117.2(3) | F(1)-B(1)-F(2)#1 | 112.0(4) | C(7)-C(6)-N(1)   | 120.3(5)  |
| C(2)-C(1)-C(2)#1 | 120.4(6) | F(3)-B(1)-F(2)#1 | 110.4(4) | C(8)-C(6)-N(1)   | 109.4(4)  |
| C(2)-C(1)-C(5)   | 119.8(3) | F(1)-B(1)-F(2)   | 112.0(4) | F(1)-B(1)-F(3)   | 106.7(5)  |
| C(2)#1-C(1)-C(5) | 119.8(3) | F(3)-B(1)-F(2)   | 110.4(4) | C(7)-C(6)-C(8)   | 122.0(5)  |
| N(1)-C(5)-C(1)   | 112.5(3) | F(2)#1-B(1)-F(2) | 105.4(4) | C(7)#1-C(6)-N(1) | 120.3(5)  |
| C(7)#1-C(6)-C(7) | 53.2(8)  | C(1)-C(2)-C(3)   | 120.2(6) | C(3)#1-C(4)-C(3) | 123.4(10) |
| C(7)#1-C(6)-C(8) | 122.0(5) | C(7)#1-C(7)-C(6) | 63.4(4)  | C(4)-C(3)-C(2)   | 117.9(8)  |

Symmetry transformations used to generate equivalent atoms: #1 x,-y,z

**Table 3.** Selected bond lengths (Å) and angles (°) of 1 in low temperature phase.

| bond lengths | (Å)      | bond lengths | (Å)      | bond lengths | (Å)       |
|--------------|----------|--------------|----------|--------------|-----------|
| F(7)-B(2)    | 1.410(4) | C(18)-C(19)  | 1.514(5) | C(14)-C(15)  | 1.378(7)  |
| N(2)-C(17)   | 1.505(4) | C(17)-C(11)  | 1.508(4) | C(12)-C(13)  | 1.386(5)  |
| N(2)-C(18)   | 1.513(3) | C(11)-C(12)  | 1.386(5) | C(16)-C(15)  | 1.394(5)  |
| F(5)-B(2)    | 1.373(4) | C(11)-C(16)  | 1.388(5) | F(1)-B(1)    | 1.400(4)  |
| F(6)-B(2)    | 1.380(4) | F(8)-B(2)    | 1.365(4) | N(1)-C(8)    | 1.505(4)  |
| C(18)-C(20)  | 1.501(4) | C(14)-C(13)  | 1.366(6) | C(8)-C(9)    | 1.507(4)  |
| N(1)-C(7)    | 1.499(4) | C(2)-C(3)    | 1.391(6) | C(3)-C(4)    | 1.371(15) |
| C(8)-C(10)   | 1.523(5) | C(1)-C(2)    | 1.364(7) | C(6)-C(5)    | 1.407(8)  |
| F(2)-B(1)    | 1.383(5) | C(1)-C(6)    | 1.395(6) | C(4)-C(5)    | 1.330(15) |
| C(7)-C(1)    | 1.502(5) | F(4)-B(1)    | 1.314(5) | F(3)-B(1)    | 1.369(5)  |

| bond angles       | (°)      | bond angles       | (°)      | bond angles    | (°)      |
|-------------------|----------|-------------------|----------|----------------|----------|
| C(17)-N(2)-C(18)  | 117.9(8) | F(6)-B(2)-F(7)    | 107.0(3) | C(2)-C(1)-C(7) | 121.2(4) |
| C(20)-C(18)-N(2)  | 111.9(2) | C(13)-C(14)-C(15) | 120.3(3) | C(1)-C(2)-C(3) | 120.5(6) |
| C(20)-C(18)-C(19) | 112.9(3) | F(1)-B(1)-F(2)    | 120.3(3) | F(4)-B(1)-F(3) | 107.6(4) |
| N(2)-C(18)-C(19)  | 107.3(2) | C(11)-C(12)-C(13) | 120.3(4) | F(4)-B(1)-F(2) | 112.4(4) |
| N(2)-C(17)-C(11)  | 111.6(2) | C(11)-C(16)-C(15) | 119.7(4) | F(3)-B(1)-F(2) | 108.8(4) |
| C(12)-C(11)-C(16) | 119.4(3) | C(14)-C(15)-C(16) | 120.1(4) | F(4)-B(1)-F(1) | 110.9(4) |
| C(12)-C(11)-C(17) | 120.5(3) | C(14)-C(13)-C(12) | 120.2(4) | F(3)-B(1)-F(1) | 109.7(3) |
| C(16)-C(11)-C(17) | 120.0(3) | C(7)-N(1)-C(8)    | 114.6(2) | F(2)-B(1)-F(1) | 107.4(3) |
| F(8)-B(2)-F(5)    | 109.6(3) | N(1)-C(8)-C(9)    | 111.6(2) | C(4)-C(3)-C(2) | 120.0(8) |
| F(8)-B(2)-F(6)    | 111.6(3) | N(1)-C(8)-C(10)   | 107.4(3) | C(1)-C(6)-C(5) | 117.8(7) |
| F(5)-B(2)-F(6)    | 109.8(3) | C(9)-C(8)-C(10)   | 112.5(3) | C(5)-C(4)-C(3) | 119.7(6) |
| F(8)-B(2)-F(7)    | 108.6(3) | N(1)-C(7)-C(1)    | 111.8(3) | C(4)-C(5)-C(6) | 122.3(8) |
| F(5)-B(2)-F(7)    | 110.2(3) | C(2)-C(1)-C(6)    | 119.6(4) |                |          |

**Table 4.** Torsion angle of 1 in room temperature phase.

---

|                       |            |
|-----------------------|------------|
| C(6)-N(1)-C(5)-C(1)   | 180.000(1) |
| C(2)-C(1)-C(5)-N(1)   | -91.8(4)   |
| C(2)#1-C(1)-C(5)-N(1) | 91.8(4)    |
| C(5)-N(1)-C(6)-C(7)#1 | 31.2(5)    |
| C(5)-N(1)-C(6)-C(7)   | -31.2(5)   |
| C(5)-N(1)-C(6)-C(8)   | 180.000(1) |
| C(2)#1-C(1)-C(2)-C(3) | -0.7(9)    |
| C(5)-C(1)-C(2)-C(3)   | -177.1(5)  |
| C(8)-C(6)-C(7)-C(7)#1 | -108.2(4)  |
| N(1)-C(6)-C(7)-C(7)#1 | 107.0(4)   |
| C(3)#1-C(4)-C(3)-C(2) | 2.7(15)    |
| C(1)-C(2)-C(3)-C(4)   | -0.9(9)    |

---

Symmetry transformations used to generate equivalent atoms: #1 x,-y,z

**Table 5.** Torsion angle of 1 in low temperature phase.

---

|                  |           |
|------------------|-----------|
| C8-N1-C7-C6      | -174.4(2) |
| N1-C7-C6-C5      | 80.1(3)   |
| N1-C7-C6-C1      | -102.4(3) |
| C7-N1-C8-C10     | -58.8(3)  |
| C7-N1-C8-C9      | 176.2(2)  |
| C5-C6-C1-C2      | -0.4(4)   |
| C7-C6-C1-C2      | -177.9(2) |
| C1-C6-C5-C4      | 0.6(4)    |
| C7-C6-C5-C4      | 178.1(2)  |
| C2-C3-C4-C5      | -0.7(5)   |
| C6-C5-C4-C3      | -0.1(5)   |
| C4-C3-C2-C1      | 0.9(5)    |
| C6-C1-C2-C3      | -0.4(4)   |
| C17-N2-C18-C19   | -57.2(3)  |
| C17-N2-C18-C20   | 178.9(2)  |
| C18-N2-C17-C16   | -168.8(2) |
| N2-C17-C16-C15   | -72.0(3)  |
| N2-C17-C16-C11   | 110.6(3)  |
| C11-C16-C15-C14  | -0.8(5)   |
| C17-C16-C15-C14  | -178.1(3) |
| C16-C15-C14-C13  | 1.1(6)    |
| C15-C16-C11-C12  | -0.6(5)   |
| C17 -C16-C11-C12 | 176.8(3)  |
| C16-C11-C12-C13  | 1.8(6)    |
| C11 -C12-C13-C14 | -1.5(7)   |
| C15-C14-C13-C12  | 0.1(7)    |

---
